# Supplementary material
Source: publisher figshare collection journal article supplement (https://frontiersin.figshare.com/ndownloader/files/14243297)

**Supplemental Figure 1.** Intestine of PBS-injected *Asal*-infected controls was highly necrotic, with many pyknotic nuclei and hemorrhage throughout (a). In contrast, vaccinated intestine retained normal architecture (b), and IgM+ lymphocytes were observed in the lamina propria, and migrating through intestinal mucosa (c).

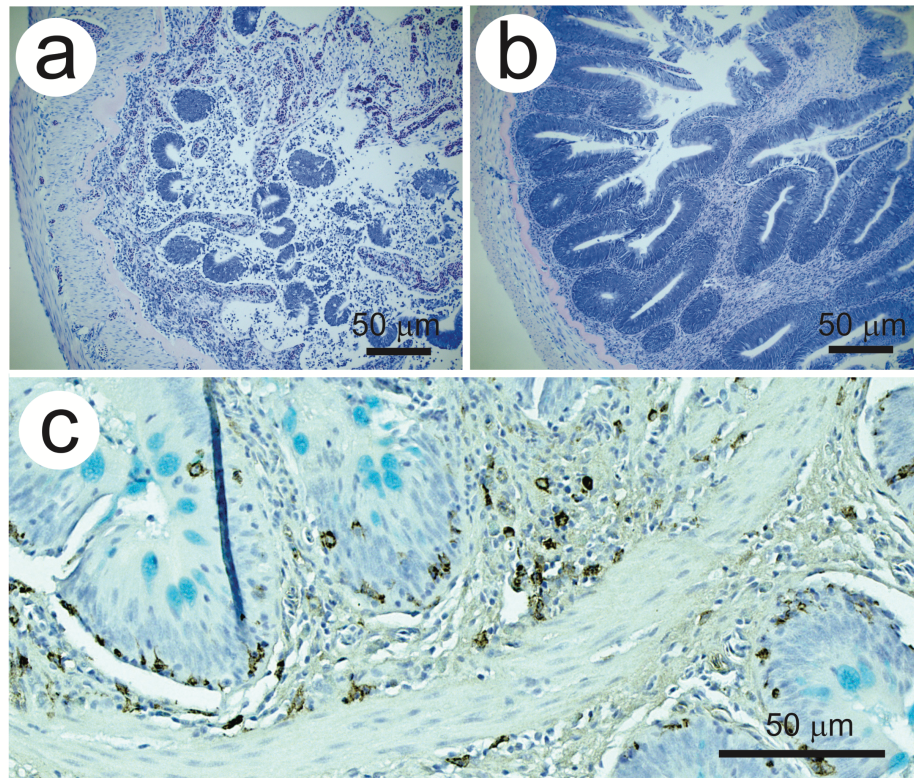

Supplement: Supplementary file [file 14243297]
